# Supplementary material
Source: MDPI journal article supplement (https://www.mdpi.com/2227-9091/10/5/106)
Supplement: s1 [file s1 › risks-1551671-supplementary.pdf]

**Table S1.** The structure of investment flows of countries of the sample in 2020, per capita (current US\$).

| Country Name.      | Responsible investments.                        |                                                    |                                                               | Commercial investments..            |                                        |
|--------------------|-------------------------------------------------|----------------------------------------------------|---------------------------------------------------------------|-------------------------------------|----------------------------------------|
|                    | Investment in energy with private participation | Investment in transport with private participation | Investment in water and sanitation with private participation | Domestic private health expenditure | Foreign direct investment, net inflows |
| Argentina          | 3.53                                            | 0.00                                               | 0.0000                                                        | 761.83                              | 148.00                                 |
| Brazil             | 26.70                                           | 1.30                                               | 0.0000                                                        | 891.57                              | 328.00                                 |
| China              | 0.60                                            | 2.00                                               | 0.01                                                          | 407.58                              | 134.00                                 |
| Colombia           | 4.03                                            | 20.00                                              | 0.0000                                                        | 327.97                              | 278.00                                 |
| Egypt, Arab Rep,   | 0.00                                            | 0.00                                               | 0.0000                                                        | 433.59                              | 89.80                                  |
| Indonesia          | 0.00                                            | 0.00                                               | 0.0000                                                        | 188.68                              | 92.40                                  |
| Kazakhstan         | 14.20                                           | 31.00                                              | 0.0000                                                        | 305.73                              | 179.00                                 |
| Kenya              | 2.74                                            | 11.00                                              | 0.0000                                                        | 75.89                               | 25.30                                  |
| Malaysia           | 0.00                                            | 0.00                                               | 0.0000                                                        | 582.67                              | 287.00                                 |
| Mexico             | 32.70                                           | 0.30                                               | 0.0000                                                        | 532.21                              | 230.00                                 |
| Nigeria            | 12.60                                           | 0.00                                               | 0.0000                                                        | 180.03                              | 11.50                                  |
| Peru               | 3.03                                            | 6.90                                               | 0.0000                                                        | 285.24                              | 274.00                                 |
| Philippines        | 1.35                                            | 0.00                                               | 0.0000                                                        | 262.29                              | 80.20                                  |
| Russian Federation | 3.38                                            | 6.40                                               | 0.0000                                                        | 603.41                              | 221.00                                 |
| South Africa       | 0.00                                            | 0.00                                               | 0.0000                                                        | 497.68                              | 87.40                                  |
| Thailand           | 3.65                                            | 0.00                                               | 0.0000                                                        | 169.06                              | 69.20                                  |
| Turkey             | 4.85                                            | 0.00                                               | 0.0000                                                        | 264.80                              | 111.00                                 |
| Vietnam            | 27.60                                           | 0.00                                               | 0.0100                                                        | 231.50                              | 167.00                                 |

Source: Compiled by the authors based on the World Bank (2021a, 2021b, 2021c, 2021d, 2021e, 2021f).

**Table S2.** Financial position of companies in 2020-2021, USD billion.

| Country/<br>Territory | Company                       | 2020  |         |        | 2021  |         |        | Sector     | Industry             |
|-----------------------|-------------------------------|-------|---------|--------|-------|---------|--------|------------|----------------------|
|                       |                               | Rank  | Profits | Assets | Rank  | Profits | Assets |            |                      |
| Argentina             | YPF                           | 1,360 | 0.71    | 26.30  | 1,692 | -0.98   | 22.90  | Energy     | Oil & Gas Operations |
| Brazil                | Itaú Unibanco Holding         | 78    | 6.90    | 408.80 | 109   | 3.70    | 389.70 | -          | -                    |
| China                 | ICBC                          | 1     | 45.30   | 4.32   | 1     | 45.80   | 4.91   | Financials | Major Banks          |
| Colombia              | Ecopetrol                     | 313   | 4.00    | 41.30  | 633   | 0.46    | 40.80  | Energy     | Oil & Gas Operations |
| Egypt                 | Commercial International Bank | 1,456 | 0.70    | 24.10  | 1,524 | 0.65    | 27.20  | Financials | Regional Banks       |
| Indonesia             | Bank Rakyat Indonesia (BRI)   | 347   | 2.40    | 102.10 | 362   | 1.30    | 107.60 | Financials | Regional Banks       |
| Kazakhstan            | Halyk Bank                    | 1,465 | 0.87    | 24.10  | 1,459 | 0.85    | 24.70  | Financials | Regional Banks       |

|              |                                                                      |       |       |        |       |       |        |                                    |                                     |
|--------------|----------------------------------------------------------------------|-------|-------|--------|-------|-------|--------|------------------------------------|-------------------------------------|
| Kenya        | Safaricom                                                            | 1,560 | 0.65  | 2.20   | 1,566 | 0.68  | 2.10   | Telecom-<br>munication<br>Services | Telecom-<br>munications<br>services |
| Malaysia     | Maybank                                                              | 349   | 2.00  | 204.00 | 364   | 1.50  | 213.00 | Financials                         | Regional<br>Banks                   |
| Mexico       | América Móvil                                                        | 157   | 3.50  | 81.10  | 194   | 2.20  | 75.60  | -                                  | -                                   |
| Nigeria      | Zenith Bank                                                          | 1,842 | 0.58  | 18.70  | 1,726 | 0.60  | 21.50  | Financials                         | Regional<br>Banks                   |
| Peru         | Credicorp                                                            | 717   | 1.30  | 56.90  | 1,419 | 0.09  | 65.80  | Financials                         | Regional<br>Banks                   |
| Philippines  | SM<br>Investments                                                    | 707   | 0.86  | 22.60  | 877   | 0.47  | 25.50  | Consumer<br>Discretionary          | Department<br>Stores                |
| Russia       | Gazprom                                                              | 32    | 22.70 | 331.70 | 367   | -0.92 | 294.90 | Energy                             | Oil & Gas<br>Operations             |
| South Africa | FirstRand                                                            | 536   | 2.00  | 122.70 | 534   | 0.92  | 132.70 | Financials                         | Major Banks                         |
| Thailand     | PTT                                                                  | 170   | 2.90  | 82.90  | 234   | 1.20  | 84.90  | -                                  | -                                   |
| Turkey       | Isbank                                                               | 718   | 0.99  | 90.30  | 673   | 1.00  | 94.00  | Financials                         | Regional<br>Banks                   |
| Vietnam      | Joint Stock<br>Commercial<br>Bank for<br>Foreign Trade<br>of Vietnam | 937   | 0.77  | 48.50  | 885   | 0.79  | 57.50  | Financials                         | Regional<br>Banks                   |

Source: Compiled by the authors based on Forbes (2022).

Table S3. Merged data set for 2020-2021.

| Y04                                                                  | Country Name     | Investment flows                                                                |                                                                                    |                                                                                                  |                                                                                                                                                                            |        | Company's financial<br>position     |       |
|----------------------------------------------------------------------|------------------|---------------------------------------------------------------------------------|------------------------------------------------------------------------------------|--------------------------------------------------------------------------------------------------|----------------------------------------------------------------------------------------------------------------------------------------------------------------------------|--------|-------------------------------------|-------|
|                                                                      |                  | Investment in energy<br>with private participation<br>per capita (current US\$) | Investment in transport<br>with private participation<br>per capita (current US\$) | Investment in water and<br>sanitation with private<br>participation per capita<br>(current US\$) | Domestic private health<br>expenditure per capita,<br>PPP (current<br>international \$)*<br>Foreign direct<br>investment, net inflows<br>per capita (BoP, current<br>US\$) |        | Company                             | Rank  |
| Investment flows in 2020 and companies<br>financial position in 2021 | Argentina        | 3.53                                                                            | 0.00                                                                               | 0.0000                                                                                           | 761.83                                                                                                                                                                     | 148.00 | YPF                                 | 1,360 |
|                                                                      | Brazil           | 26.70                                                                           | 1.30                                                                               | 0.0000                                                                                           | 891.57                                                                                                                                                                     | 328.00 | Itaú Unibanco<br>Holding            | 78    |
|                                                                      | China            | 0.60                                                                            | 2.00                                                                               | 0.01                                                                                             | 407.58                                                                                                                                                                     | 134.00 | ICBC                                | 1     |
|                                                                      | Colombia         | 4.03                                                                            | 20.00                                                                              | 0.0000                                                                                           | 327.97                                                                                                                                                                     | 278.00 | Ecopetrol                           | 313   |
|                                                                      | Egypt, Arab Rep, | 0.00                                                                            | 0.00                                                                               | 0.0000                                                                                           | 433.59                                                                                                                                                                     | 89.80  | Commercial<br>International<br>Bank | 1,456 |
|                                                                      | Indonesia        | 0.00                                                                            | 0.00                                                                               | 0.0000                                                                                           | 188.68                                                                                                                                                                     | 92.40  | Bank Rakyat<br>Indonesia (BRI)      | 347   |
|                                                                      | Kazakhstan       | 14.20                                                                           | 31.00                                                                              | 0.0000                                                                                           | 305.73                                                                                                                                                                     | 179.00 | Halyk Bank                          | 1,465 |
|                                                                      | Kenya            | 2.74                                                                            | 11.00                                                                              | 0.0000                                                                                           | 75.89                                                                                                                                                                      | 25.30  | Safaricom                           | 1,560 |
|                                                                      | Malaysia         | 0.00                                                                            | 0.00                                                                               | 0.0000                                                                                           | 582.67                                                                                                                                                                     | 287.00 | Maybank                             | 349   |
|                                                                      | Mexico           | 32.70                                                                           | 0.30                                                                               | 0.0000                                                                                           | 532.21                                                                                                                                                                     | 230.00 | América Móvil                       | 157   |
|                                                                      | Nigeria          | 12.60                                                                           | 0.00                                                                               | 0.0000                                                                                           | 180.03                                                                                                                                                                     | 11.50  | Zenith Bank                         | 1,842 |

|                                                                    |                    |       |       |        |        |        |                                                          |       |
|--------------------------------------------------------------------|--------------------|-------|-------|--------|--------|--------|----------------------------------------------------------|-------|
| Investment flows in 2019 and companies' financial position in 2020 | Peru               | 3.03  | 6.90  | 0.0000 | 285.24 | 274.00 | Credicorp                                                | 717   |
|                                                                    | Philippines        | 1.35  | 0.00  | 0.0000 | 262.29 | 80.20  | SM Investments                                           | 707   |
|                                                                    | Russian Federation | 3.38  | 6.40  | 0.0000 | 603.41 | 221.00 | Gazprom                                                  | 32    |
|                                                                    | South Africa       | 0.00  | 0.00  | 0.0000 | 497.68 | 87.40  | FirstRand                                                | 536   |
|                                                                    | Thailand           | 3.65  | 0.00  | 0.0000 | 169.06 | 69.20  | PTT                                                      | 170   |
|                                                                    | Turkey             | 4.85  | 0.00  | 0.0000 | 264.80 | 111.00 | Isbank                                                   | 718   |
|                                                                    | Vietnam            | 27.60 | 0.00  | 0.0100 | 231.50 | 167.00 | Joint Stock Commercial Bank for Foreign Trade of Vietnam | 937   |
|                                                                    | Argentina          | 45.80 | 0.00  | 0.0000 | 761.83 | 263.00 | YPF                                                      | 1,692 |
|                                                                    | Brazil             | 70.80 | 13.00 | 0.0000 | 891.57 | 373.00 | Itaú Unibanco Holding                                    | 109   |
|                                                                    | China              | 0.01  | 16    | 0.0100 | 407.58 | 120    | ICBC                                                     | 1     |
|                                                                    | Colombia           | 3.28  | 53.00 | 0.0000 | 327.97 | 228.00 | Ecopetrol                                                | 633   |
|                                                                    | Egypt, Arab Rep,   | 3.34  | 1.50  | 0.0000 | 433.59 | 82.70  | Commercial International Bank                            | 1,524 |
|                                                                    | Indonesia          | 1.07  | 0.00  | 0.0200 | 188.68 | 70.60  | Bank Rakyat Indonesia (BRI)                              | 362   |
|                                                                    | Kazakhstan         | 29.90 | 0.00  | 0.0000 | 305.73 | 4.56   | Halyk Bank                                               | 1,459 |
|                                                                    | Kenya              | 4.19  | 0.00  | 0.0000 | 75.89  | 31.60  | Safaricom                                                | 1,566 |
|                                                                    | Malaysia           | 2.97  | 0.00  | 0.0000 | 582.67 | 263.00 | Maybank                                                  | 364   |
|                                                                    | Mexico             | 21.30 | 2.00  | 0.0100 | 532.21 | 299.00 | América Móvil                                            | 194   |
|                                                                    | Nigeria            | 0.00  | 5.20  | 0.0000 | 180.03 | 3.96   | Zenith Bank                                              | 1,726 |
|                                                                    | Peru               | 1.66  | 0.00  | 0.0200 | 285.24 | 203.00 | Credicorp                                                | 1,419 |
|                                                                    | Philippines        | 0.49  | 16.00 | 0.0000 | 262.29 | 93.30  | SM Investments                                           | 877   |
|                                                                    | Russian Federation | 4.52  | 23.00 | 0.0000 | 603.41 | 60.80  | Gazprom                                                  | 367   |
|                                                                    | South Africa       | 16.40 | 0.20  | 0.0000 | 497.68 | 96.40  | FirstRand                                                | 534   |
|                                                                    | Thailand           | 23.70 | 0.00  | 0.0000 | 169.06 | 190.00 | PTT                                                      | 234   |
|                                                                    | Turkey             | 9.38  | 2.90  | 0.0000 | 264.80 | 156.00 | Isbank                                                   | 673   |
|                                                                    | Vietnam            | 34.10 | 11.00 | 0.0000 | 231.50 | 162.00 | Joint Stock Commercial Bank for Foreign Trade of Vietnam | 885   |

\*The materials of the World Bank (2021a) have only the data for 2018, which are provided in the data set for both periods. Source: Calculated and compiled by the authors based on the materials of Forbes (2022) and World Bank (2021a, 2021b, 2021c, 2021d, 2021e, 2021f).

**Table S4.** Description of the variables.

| INDICATOR_NAME                                                               | SOURCE_NOTE                                                                                                                                                                                                                                                                                                                                                                                                                                                                                                                                                                                                                                                                                                                                                                                                                                                                                                                                                                                                                                                                                                                                                                                                                                                    | SOURCE_ORGANIZATION                                                                                                                       |
|------------------------------------------------------------------------------|----------------------------------------------------------------------------------------------------------------------------------------------------------------------------------------------------------------------------------------------------------------------------------------------------------------------------------------------------------------------------------------------------------------------------------------------------------------------------------------------------------------------------------------------------------------------------------------------------------------------------------------------------------------------------------------------------------------------------------------------------------------------------------------------------------------------------------------------------------------------------------------------------------------------------------------------------------------------------------------------------------------------------------------------------------------------------------------------------------------------------------------------------------------------------------------------------------------------------------------------------------------|-------------------------------------------------------------------------------------------------------------------------------------------|
| Investment in energy with private participation (current US\$)               | <p>Investment in energy projects with private participation refers to commitments to infrastructure projects in energy (electricity and natural gas: Generation, transmission and distribution) that have reached financial closure and directly or indirectly serve the public. Movable assets and small projects such as windmills are excluded. The types of projects included are management and lease contracts, operations and management contracts with major capital expenditure, greenfield projects (in which a private entity or a public-private joint venture builds and operates a new facility), and divestitures. Investment commitments are the sum of investments in facilities and investments in government assets. Investments in facilities are the resources the project company commits to invest during the contract period either in new facilities or in expansion and modernization of existing facilities. Investments in government assets are the resources the project company spends on acquiring government assets such as state-owned enterprises, rights to provide services in a specific area, or the use of specific radio spectrums. Data is presented based on investment year. Data are in current U.S. dollars.</p> | World Bank, Private Participation in Infrastructure Project Database ( <a href="http://ppi.worldbank.org">http://ppi.worldbank.org</a> ). |
| Investment in water and sanitation with private participation (current US\$) | <p>Investment in water and sanitation projects with private participation refers to commitments to infrastructure projects in water and sanitation that have reached financial closure and directly or indirectly serve the public. Movable assets, incinerators, standalone solid waste projects, and small projects are excluded. The types of projects included are management and lease contracts, operations and management contracts with major capital expenditure, greenfield projects (in which a private entity or a public-private joint venture builds and operates a new facility), and divestitures. Investment commitments are the sum of investments in facilities and investments in government assets. Investments in facilities are the resources the project company commits to invest during the contract period either in new facilities or in expansion and modernization of existing facilities. Investments in government assets are the resources the project company spends on acquiring government assets such as state-owned enterprises, rights to provide services in a specific area, or the use of specific radio</p>                                                                                                         | World Bank, Private Participation in Infrastructure Project Database ( <a href="http://ppi.worldbank.org">http://ppi.worldbank.org</a> ). |

|                                                                                |                                                                                                                                                                                                                                                                                                                                                                                                                                                                                                                                                                                                                                                                                                                                                                                                                                                                                                                                                                                                                                                                                                                                                                    |                                                                                                                                                                                                                                                                                                                                    |
|--------------------------------------------------------------------------------|--------------------------------------------------------------------------------------------------------------------------------------------------------------------------------------------------------------------------------------------------------------------------------------------------------------------------------------------------------------------------------------------------------------------------------------------------------------------------------------------------------------------------------------------------------------------------------------------------------------------------------------------------------------------------------------------------------------------------------------------------------------------------------------------------------------------------------------------------------------------------------------------------------------------------------------------------------------------------------------------------------------------------------------------------------------------------------------------------------------------------------------------------------------------|------------------------------------------------------------------------------------------------------------------------------------------------------------------------------------------------------------------------------------------------------------------------------------------------------------------------------------|
|                                                                                | spectrums. Data is presented based on investment year. Data are in current U.S. dollars.                                                                                                                                                                                                                                                                                                                                                                                                                                                                                                                                                                                                                                                                                                                                                                                                                                                                                                                                                                                                                                                                           |                                                                                                                                                                                                                                                                                                                                    |
| Investment in transport with private participation (current US\$)              | Investment in transport projects with private participation refers to commitments to infrastructure projects in transport that have reached financial closure and directly or indirectly serve the public. Movable assets and small projects are excluded. The types of projects included are management and lease contracts, operations and management contracts with major capital expenditure, greenfield projects (in which a private entity or a public-private joint venture builds and operates a new facility), and divestitures. Investment commitments are the sum of investments in facilities and investments in government assets. Investments in facilities are the resources the project company commits to invest during the contract period either in new facilities or in expansion and modernization of existing facilities. Investments in government assets are the resources the project company spends on acquiring government assets such as state-owned enterprises, rights to provide services in a specific area, or the use of specific radio spectrums. Data is presented based on investment year. Data are in current U.S. dollars. | World Bank, Private Participation in Infrastructure Project Database ( <a href="http://ppi.worldbank.org">http://ppi.worldbank.org</a> ).                                                                                                                                                                                          |
| Domestic private health expenditure per capita, PPP (current international \$) | Current private expenditures on health per capita expressed in international dollars at purchasing power parity (PPP time series based on ICP2011 PPP).                                                                                                                                                                                                                                                                                                                                                                                                                                                                                                                                                                                                                                                                                                                                                                                                                                                                                                                                                                                                            | World Health Organization Global Health Expenditure database.                                                                                                                                                                                                                                                                      |
| Foreign direct investment, net inflows (BoP, current US\$)                     | Foreign direct investment refers to direct investment equity flows in the reporting economy. It is the sum of equity capital, reinvestment of earnings, and other capital. Direct investment is a category of cross-border investment associated with a resident in one economy having control or a significant degree of influence on the management of an enterprise that is resident in another economy. Ownership of 10 percent or more of the ordinary shares of voting stock is the criterion for determining the existence of a direct investment relationship. Data are in current U.S. dollars.                                                                                                                                                                                                                                                                                                                                                                                                                                                                                                                                                           | International Monetary Fund, Balance of Payments database, supplemented by data from the United Nations Conference on Trade and Development and official national sources.                                                                                                                                                         |
| Population, total                                                              | Total population is based on the de facto definition of population, which counts all residents regardless of legal status or citizenship. The values shown are midyear estimates.                                                                                                                                                                                                                                                                                                                                                                                                                                                                                                                                                                                                                                                                                                                                                                                                                                                                                                                                                                                  | (1) United Nations Population Division. World Population Prospects: 2019 Revision. (2) Census reports and other statistical publications from national statistical offices, (3) Eurostat: Demographic Statistics, (4) United Nations Statistical Division. Population and Vital Statistics Reprot (various years), (5) U.S. Census |

---

Bureau: International Database, and  
(6) Secretariat of the Pacific  
Community: Statistics and  
Demography Programme.

---

Source: World Bank (2021a, 2021b, 2021c, 2021d, 2021e, 2021f).
